# Supplementary material
Source: ML conference proceedings conference paper supplement (https://openreview.net/forum?id=mFhwB1hmLK)
Supplement: supplementary_material [file attachment]

# QE-BEV: Query Evolution for Bird's Eye View Object Detection in Varied Contexts – Supplementary Materials –

Anonymous Authors

## 1 ADDITIONAL RESULTS

### 1.1 Quantitative Performance on nuScenes [1] (test set)

Table 1: Performance comparison on nuScenes test split.

| Method          | Backbone        | Epochs          | NDS         | mAP         | mATE  | mASE  | mAOE  | mAVE  | mAAE  |
|-----------------|-----------------|-----------------|-------------|-------------|-------|-------|-------|-------|-------|
| DETR3D [15]     | V2-99           | 24              | 47.9        | 41.2        | 0.641 | 0.255 | 0.394 | 0.845 | 0.133 |
| PETR [10]       | V2-99           | 24              | 50.4        | 44.1        | 0.593 | 0.249 | 0.383 | 0.808 | 0.132 |
| UVTR [5]        | V2-99           | 24              | 55.1        | 47.2        | 0.577 | 0.253 | 0.391 | 0.508 | 0.123 |
| BEVFormer [7]   | V2-99           | 24              | 56.9        | 48.1        | 0.582 | 0.256 | 0.375 | 0.378 | 0.126 |
| BEVDet4D [2]    | Swin-B [12]     | 90 <sup>‡</sup> | 56.9        | 45.1        | 0.511 | 0.241 | 0.386 | 0.301 | 0.121 |
| PolarFormer [3] |                 | 24              | 57.2        | 49.3        | 0.556 | 0.256 | 0.364 | 0.440 | 0.127 |
| PETrv2 [11]     | V2-99           | 24              | 59.1        | 50.8        | 0.543 | 0.241 | 0.360 | 0.367 | 0.118 |
| Sparse4D [8]    | V2-99           | 48              | 59.5        | 51.1        | 0.533 | 0.263 | 0.369 | 0.317 | 0.124 |
| BEVDepth [6]    | V2-99           | 90 <sup>‡</sup> | 60.0        | 50.3        | 0.445 | 0.245 | 0.378 | 0.320 | 0.126 |
| BEVStereo [4]   | V2-99           | 90 <sup>‡</sup> | 61.0        | 52.5        | 0.431 | 0.246 | 0.358 | 0.357 | 0.138 |
| SOLOFusion [14] | ConvNeXt-B [13] | 90 <sup>‡</sup> | 61.9        | 54.0        | 0.453 | 0.257 | 0.376 | 0.276 | 0.148 |
| SparseBEV [9]   |                 | 24              | 62.7        | 54.3        | 0.502 | 0.244 | 0.324 | 0.251 | 0.126 |
| <b>QE-BEV</b>   | V2-99           | 24              | <b>65.7</b> | <b>59.2</b> | 0.326 | 0.261 | 0.293 | 0.252 | 0.183 |

The performance of QE-BEV compared with other state-of-the-art methods on the test set of nuScenes is in Table 1. We still outperform all the baselines by an obvious gap of +3.0 in NDS and +4.9 in mAP. It also reveals considerable advantages.

### 1.2 Parameter Sensitivity in Dynamic Adaptation and Temporal Fusion

The optimal values for key parameters are discussed with respect to their impact on model performance. As shown in Figure 1a, the optimal value for  $\beta$  is around 0.6, providing the best blend of initial and dynamically aggregated features. Deviating too much from this value results in suboptimal performance. Similarly, Figure 1b shows that the value of  $\alpha = 0.4$  yields the highest NDS and mAP, suggesting that balancing the current and previous dynamic queries effectively captures temporal information.

## 2 CORRECTION OF TYPOS

Due to an oversight, the data depicted in Figure 6 of the main paper was inadvertently taken from a previous experiment, and not from the most recent results that were intended for this submission. The revised Figure 6 is provided to ensure accurate evaluation of our work, as shown in Figure 2. Additionally, the '60.5' in the original manuscript's statement 'QE-BEV outshines its competitors with an NDS of 60.5' is a typo error; it should be 61.1.

We have also submitted the log files from both experiments as supplementary materials to verify the authenticity of the research data. I deeply regret this mistake and sincerely apologize for any inconvenience it may have caused. We value the opportunity to contribute to the ACM MM conference and appreciate your understanding and support.

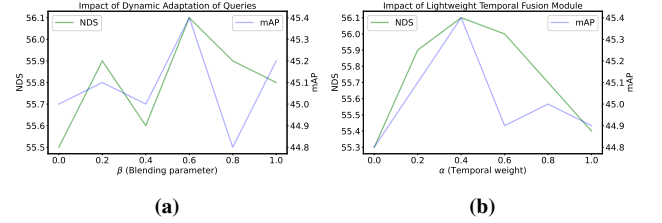

Figure 1: Sensitivity analysis of parameters  $\beta$  and  $\alpha$  in the model.

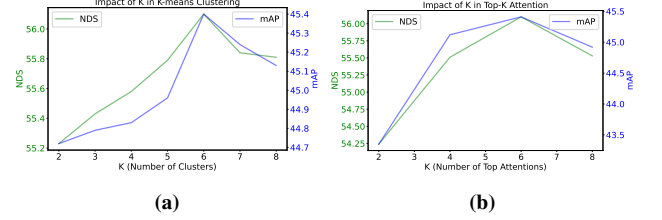

Figure 2: Sensitivity analysis of parameters  $\beta$  and  $\alpha$  in the model.

## REFERENCES

- [1] Holger Caesar, Varun Bankiti, Alex H Lang, Sourabh Vora, Venice Erin Liong, Qiang Xu, Anush Krishnan, Yu Pan, Giancarlo Baldan, and Oscar Beijbom. 2020. nuscenes: A multimodal dataset for autonomous driving. In *Proceedings of the IEEE/CVF conference on computer vision and pattern recognition*. 11621–11631.
- [2] Junjie Huang and Guan Huang. 2022. Bevdet4d: Exploit temporal cues in multi-camera 3d object detection. *arXiv preprint arXiv:2203.17054* (2022).
- [3] Yanqin Jiang, Li Zhang, Zhenwei Miao, Xiatian Zhu, Jin Gao, Weiming Hu, and Yu-Gang Jiang. 2022. Polarformer: Multi-camera 3d object detection with polar transformers. *arXiv preprint arXiv:2206.15398* (2022).
- [4] Yinhao Li, Han Bao, Zheng Ge, Jinrong Yang, Jianjian Sun, and Zeming Li. 2022. BEVStereo: Enhancing Depth Estimation in Multi-view 3D Object Detection with Dynamic Temporal Stereo. *arXiv preprint arXiv:2209.10248* (2022).
- [5] Yanwei Li, Yilun Chen, Xiaojuan Qi, Zeming Li, Jian Sun, and Jiaya Jia. 2022. Unifying Voxel-based Representation with Transformer for 3D Object Detection. In *Advances in Neural Information Processing Systems*.
- [6] Yinhao Li, Zheng Ge, Guanyi Yu, Jinrong Yang, Zengran Wang, Yukang Shi, Jianjian Sun, and Zeming Li. 2022. Bevdepth: Acquisition of reliable depth for multi-view 3d object detection. *arXiv preprint arXiv:2206.10092* (2022).
- [7] Zhiqi Li, Wenhao Wang, Hongyang Li, Enze Xie, Chonghao Sima, Tong Lu, Yu Qiao, and Jifeng Dai. 2022. BEVFormer: Learning Bird's-Eye-View Representation from Multi-camera Images via Spatiotemporal Transformers. In *European Conference on Computer Vision (ECCV)*. Springer, 1–18.
- [8] Xuewu Lin, Tianwei Lin, Zixiang Pei, Lichao Huang, and Zhizhong Su. 2022. Sparse4d: Multi-view 3d object detection with sparse spatial-temporal fusion. *arXiv preprint arXiv:2211.10581* (2022).
- [9] Haisong Liu, Yao Teng, Tao Lu, Haiguang Wang, and Limin Wang. 2023. SparseBEV: High-Performance Sparse 3D Object Detection from Multi-Camera Videos. *arXiv preprint arXiv:2308.09244* (2023).
- [10] Yingfei Liu, Tiancai Wang, Xiangyu Zhang, and Jian Sun. 2022. PETR: Position Embedding Transformation for Multi-view 3D Object Detection. In *European Conference on Computer Vision (ECCV)*. Springer, 531–548.
- [11] Yingfei Liu, Junjie Yan, Fan Jia, Shuailin Li, Qi Gao, Tiancai Wang, Xiangyu Zhang, and Jian Sun. 2022. PETrv2: A Unified Framework for 3D Perception from Multi-Camera Images. *arXiv preprint arXiv:2206.01256* (2022).

- [12] Ze Liu, Yutong Lin, Yue Cao, Han Hu, Yixuan Wei, Zheng Zhang, Stephen Lin, and Baining Guo. 2021. Swin transformer: Hierarchical vision transformer using shifted windows. In *Proceedings of the IEEE/CVF International Conference on Computer Vision*. 10012–10022.
- [13] Zhuang Liu, Hanzi Mao, Chao-Yuan Wu, Christoph Feichtenhofer, Trevor Darrell, and Saining Xie. 2022. A convnet for the 2020s. In *Proceedings of the IEEE/CVF conference on computer vision and pattern recognition*. 11976–11986.

- [14] Jinhyung Park, Chenfeng Xu, Shijia Yang, Kurt Keutzer, Kris Kitani, Masayoshi Tomizuka, and Wei Zhan. 2022. Time will tell: New outlooks and a baseline for temporal multi-view 3d object detection. *arXiv preprint arXiv:2210.02443* (2022).
- [15] Yue Wang, Vitor Campagnolo Guizilini, Tianyuan Zhang, Yilun Wang, Hang Zhao, and Justin Solomon. 2022. Detr3d: 3d object detection from multi-view images via 3d-to-2d queries. In *Conference on Robot Learning*. PMLR, 180–191.

175  
176  
177  
178  
179  
180  
181  
182  
183  
184  
185  
186  
187  
188  
189  
190  
191  
192  
193  
194  
195  
196  
197  
198  
199  
200  
201  
202  
203  
204  
205  
206  
207  
208  
209  
210  
211  
212  
213  
214  
215  
216  
217  
218  
219  
220  
221  
222  
223  
224  
225  
226  
227  
228  
229  
230  
231  
232
